# Supplementary material for: Temporal coordination of the transcription factor response to H2O2 stress
Source: Springer Nature journal article supplement (doi:10.1038/s41467-024-47837-w), 2024-04-23
Supplement: MOESM1 [file 41467_2024_47837_MOESM1_ESM.pdf]

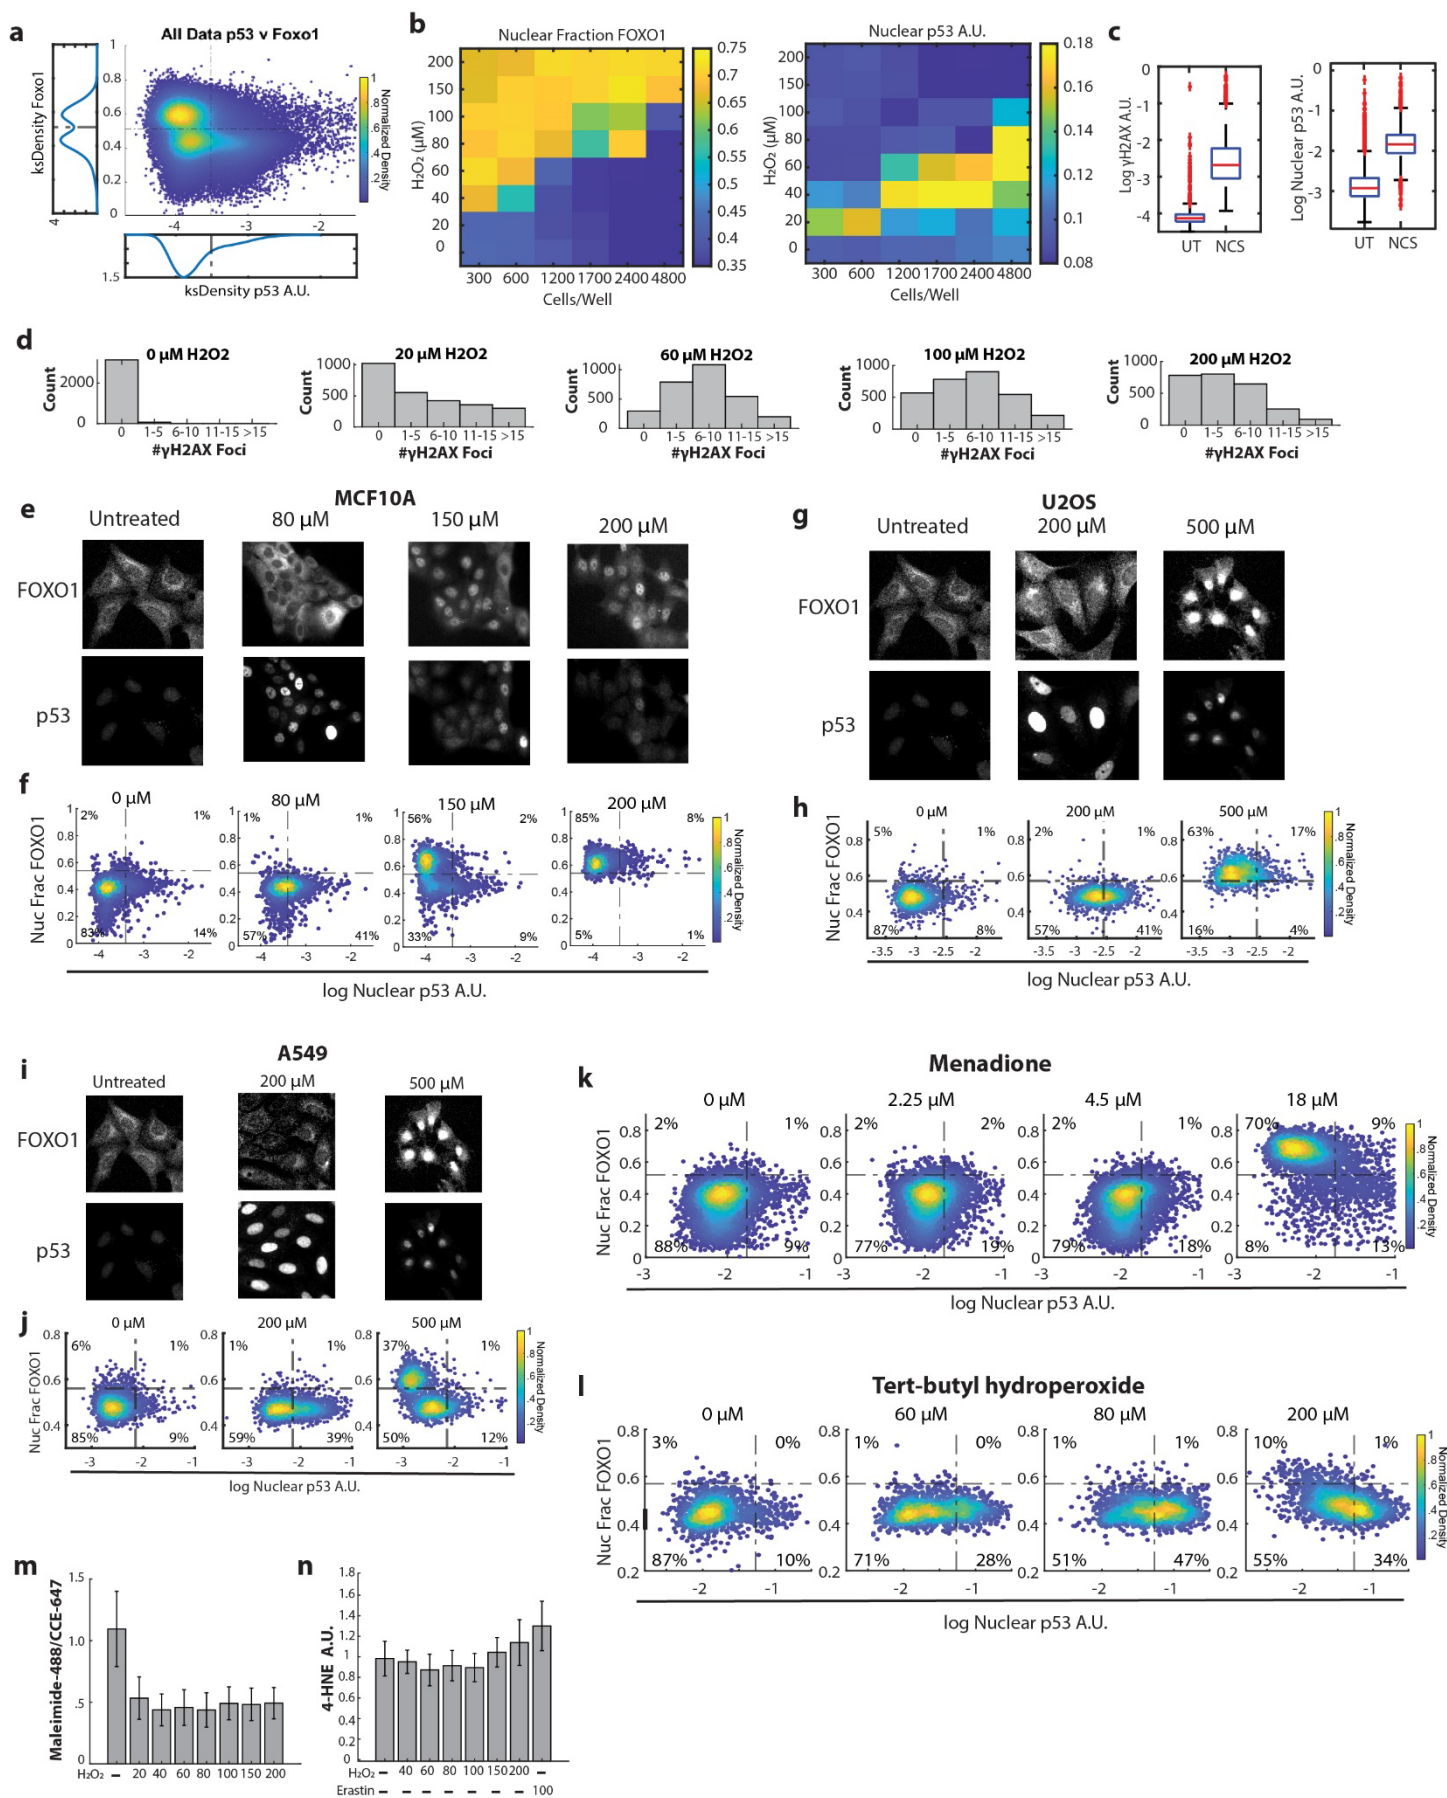

**Supplemental Figure 1: Mutually exclusive activation of FOXO1 and p53 in other cell lines.** **a** Density colored scatter plot of all cells used in Figure 1A-C. Dashed lines indicate thresholds for p53 and FOXO1 activation. Population density plots of nuclear fraction of FOXO1 (left) and p53 (below) used for thresholding data are shown. **b** Heat maps showing the mean nuclear fraction of FOXO1 (left) and mean p53 levels (right) of cells plated at specified cell numbers per well of a 96-well plate (x-axis) and indicated concentrations of H<sub>2</sub>O<sub>2</sub> (y-axis). **c** Bar and whisker plots of nuclear  $\gamma$ H2AX (left) and nuclear p53 levels (right) after 3 hours of treatment with 400ng/mL of Neocarzinostatin (NCS), n>3000 cells. Central line is median, bottom and top edges of box are 25<sup>th</sup> and 75<sup>th</sup> percentiles. Whiskers indicate extreme data points. Red pluses are outliers. **d** Histograms of  $\gamma$ H2AX foci per cell, n>2000 cells. Measured by immunofluorescence. **e** Immunofluorescence images of MCF10A cells treated with H<sub>2</sub>O<sub>2</sub> and stained for FOXO1 (top) and p53 (bottom). **f** Density colored scatter plots of log p53 (x-axis) and the nuclear fraction of FOXO1 (y-axis) in MCF10A cells (n>1500 cells) treated with H<sub>2</sub>O<sub>2</sub>. **g** Immunofluorescence images of U2OS cells treated with H<sub>2</sub>O<sub>2</sub> and stained for FOXO1 (top) and p53 (bottom). **h** Density colored scatter plots of log p53 levels (x-axis) and the nuclear fraction of FOXO1 (y-axis) in U2OS cells (n>900) treated with H<sub>2</sub>O<sub>2</sub>. **i** Immunofluorescence images of A549 cells treated with H<sub>2</sub>O<sub>2</sub> and stained for FOXO1 (top) and p53 (bottom). **j** Density colored scatter plots of log p53 levels (x-axis) and the nuclear fraction of FOXO1 (y-axis) in A549 cells (n>2000) treated with H<sub>2</sub>O<sub>2</sub>. **k** Density colored scatter plots of log p53 levels (x-axis) and the nuclear fraction of FOXO1 (y-axis) in MCF7 cells (n>5000) treated with Menadione for 5 hours. Data measured by immunofluorescence. **l** Density colored scatter plot of log p53 levels (x-axis) and the nuclear fraction of FOXO1 (y-axis) in MCF7 cells (n>1000) treated with tert-butyl hydroperoxide concentrations. Data measured by immunofluorescence. **m** Median ratio of maleimide-488, and CCE-647. Measured by immunofluorescence. H<sub>2</sub>O<sub>2</sub> treatment was for 3 hours. Error bars are the median absolute deviation, n>2000 cells. **n** Median 4-HNE staining. Cells were treated with H<sub>2</sub>O<sub>2</sub> for 3 hours. 100  $\mu$ m erastin treatment for 24 hours, n>500 cells. All immunofluorescence experiments were repeated three times with similar results. Source data are provided in Source Data Supp Figure 1.

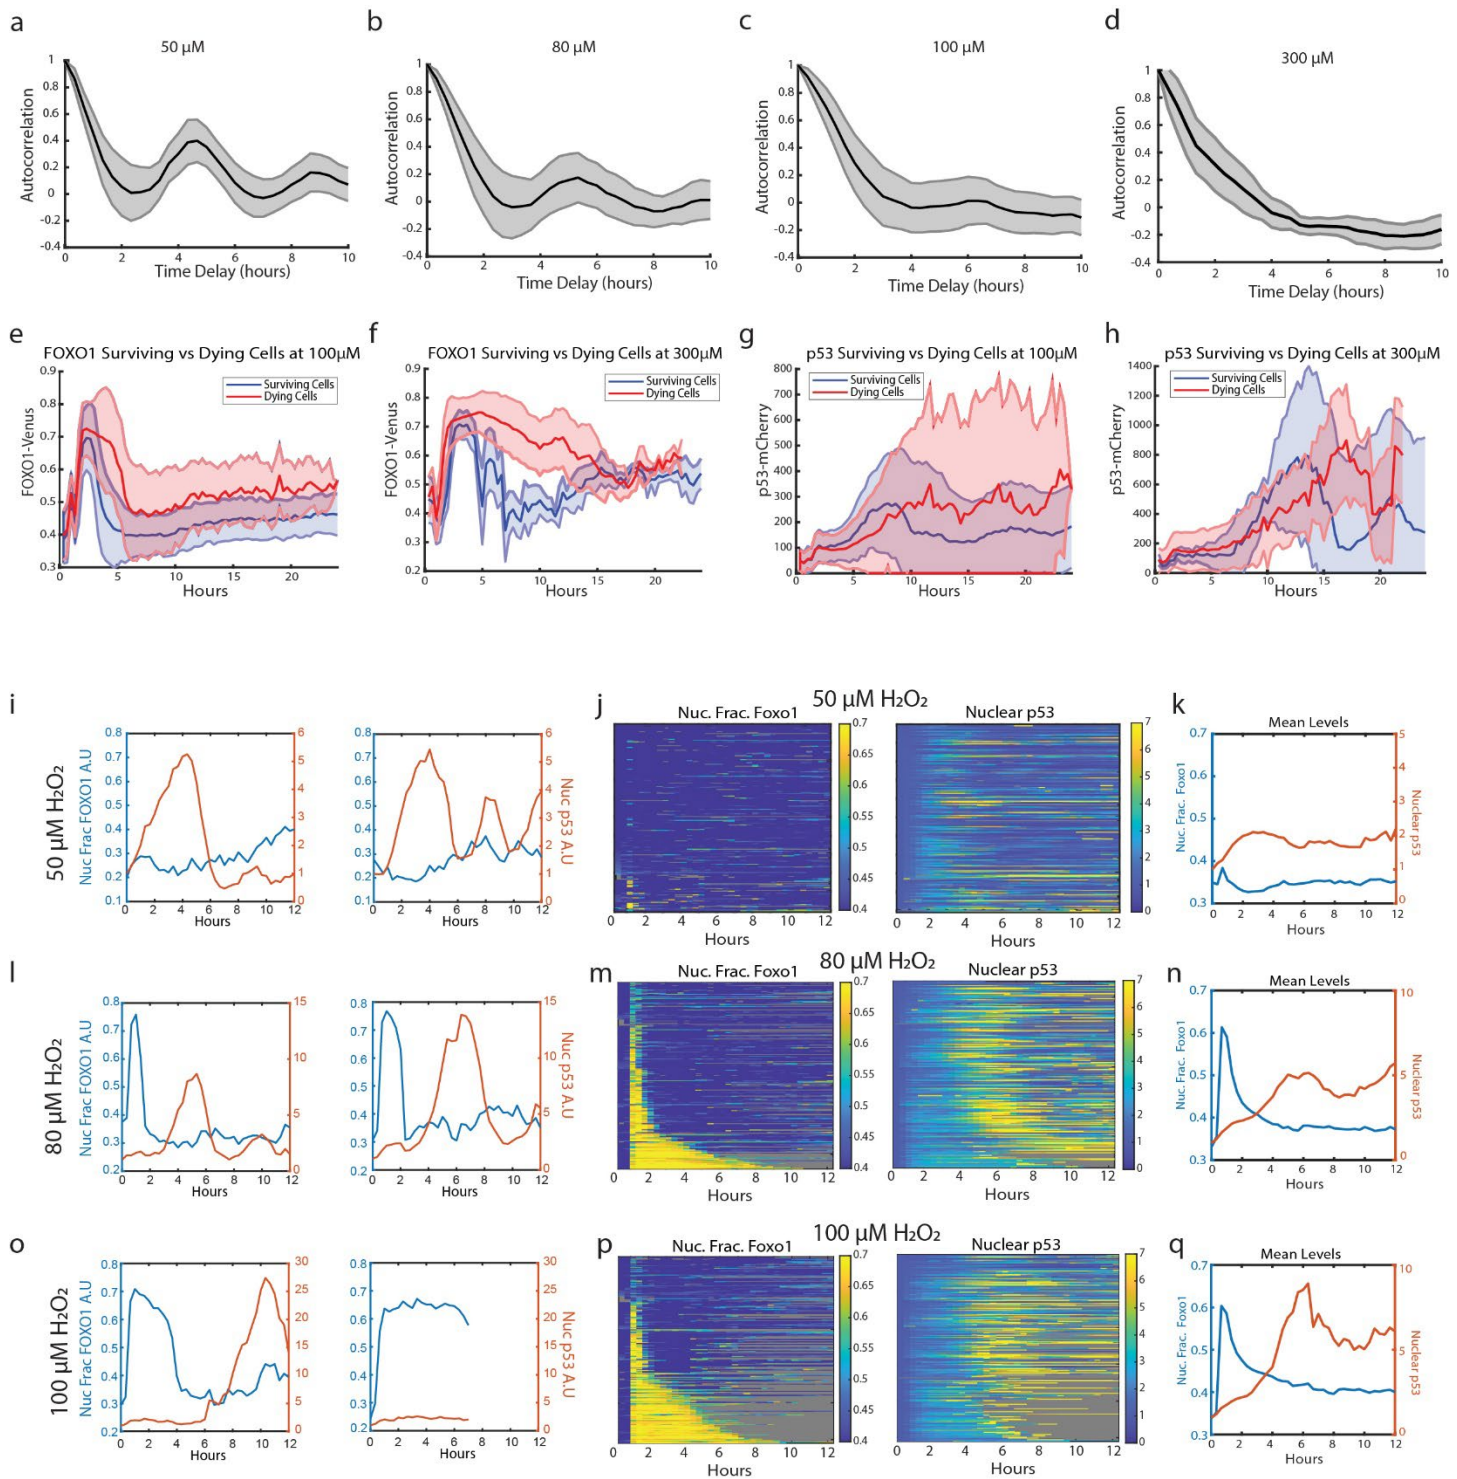

**Supplemental Fig 2: FOXO1 and p53 dynamics in response to  $\text{H}_2\text{O}_2$  stress.** **a-d** Median autocorrelation of p53 trajectories of cells treated with **a** 50  $\mu\text{M}$  ( $n=188$ ), **b** 80  $\mu\text{M}$  ( $n=238$ ), **c** 100  $\mu\text{M}$  ( $n=288$ ) and **d** 300  $\mu\text{M}$  ( $n=186$ )  $\text{H}_2\text{O}_2$ . **e-f** FOXO1-mVenus levels in surviving (blue) and dead (red) cells treated with **e** 100  $\mu\text{M}$  ( $n=190$  living, 98 dead), and **f** 300  $\mu\text{M}$  ( $n=6$  living, 180 dying) of  $\text{H}_2\text{O}_2$  over 24 hours. **g-h** p53-mCherry levels in surviving (blue) and dead (red) cells treated with **g** 100  $\mu\text{M}$ , and **h** 300  $\mu\text{M}$  of  $\text{H}_2\text{O}_2$  over 24 hours. Data in **a-h** is from MCF7 cells and is the same dataset used in Figure 2. Shaded area in **a-h** plots represent the median absolute deviation. **i,l,o** Two representative single-cell traces of nuclear fraction of FOXO1-mVenus (blue, left y-axis) and nuclear p53-mCherry from MCF10A cells treated with **i** 50  $\mu\text{M}$ , **l** 80  $\mu\text{M}$  and **o** 100  $\mu\text{M}$   $\text{H}_2\text{O}_2$ . Cells were imaged every 20 minutes for 12 hours.  $\text{H}_2\text{O}_2$  was added 40 minutes into the experiment. **j,m,p** Heat maps of single-cell traces of

nuclear fraction of FOXO1-mVenus (left), and nuclear p53-mCherry (right) for 12 hours following H<sub>2</sub>O<sub>2</sub>. Each row of the heat maps is a single cell over time. Both FOXO1-mVenus and p53-mCherry heat maps are sorted by the duration that FOXO1-mVenus remained in the nucleus. Gray indicates cell death. Cells were treated with **j** 50  $\mu$ M H<sub>2</sub>O<sub>2</sub> (n=201, 6% cell death), **m** 80  $\mu$ M H<sub>2</sub>O<sub>2</sub> (n=216, 30% cell death) and **p** 100  $\mu$ M H<sub>2</sub>O<sub>2</sub> (n=254, 58% cell death). **k,n,q** Mean nuclear fraction of FOXO1-mVenus (blue, left y-axis), and p53-mcherry (red, right y-axis) for cells treated with **k** 50  $\mu$ M H<sub>2</sub>O<sub>2</sub>, **n** 80  $\mu$ M H<sub>2</sub>O<sub>2</sub>, and **q** 100  $\mu$ M H<sub>2</sub>O<sub>2</sub>. Source data are provided in Source Data Supp Figure 2. Time-lapse imaging experiments were repeated a total of three times with similar results.



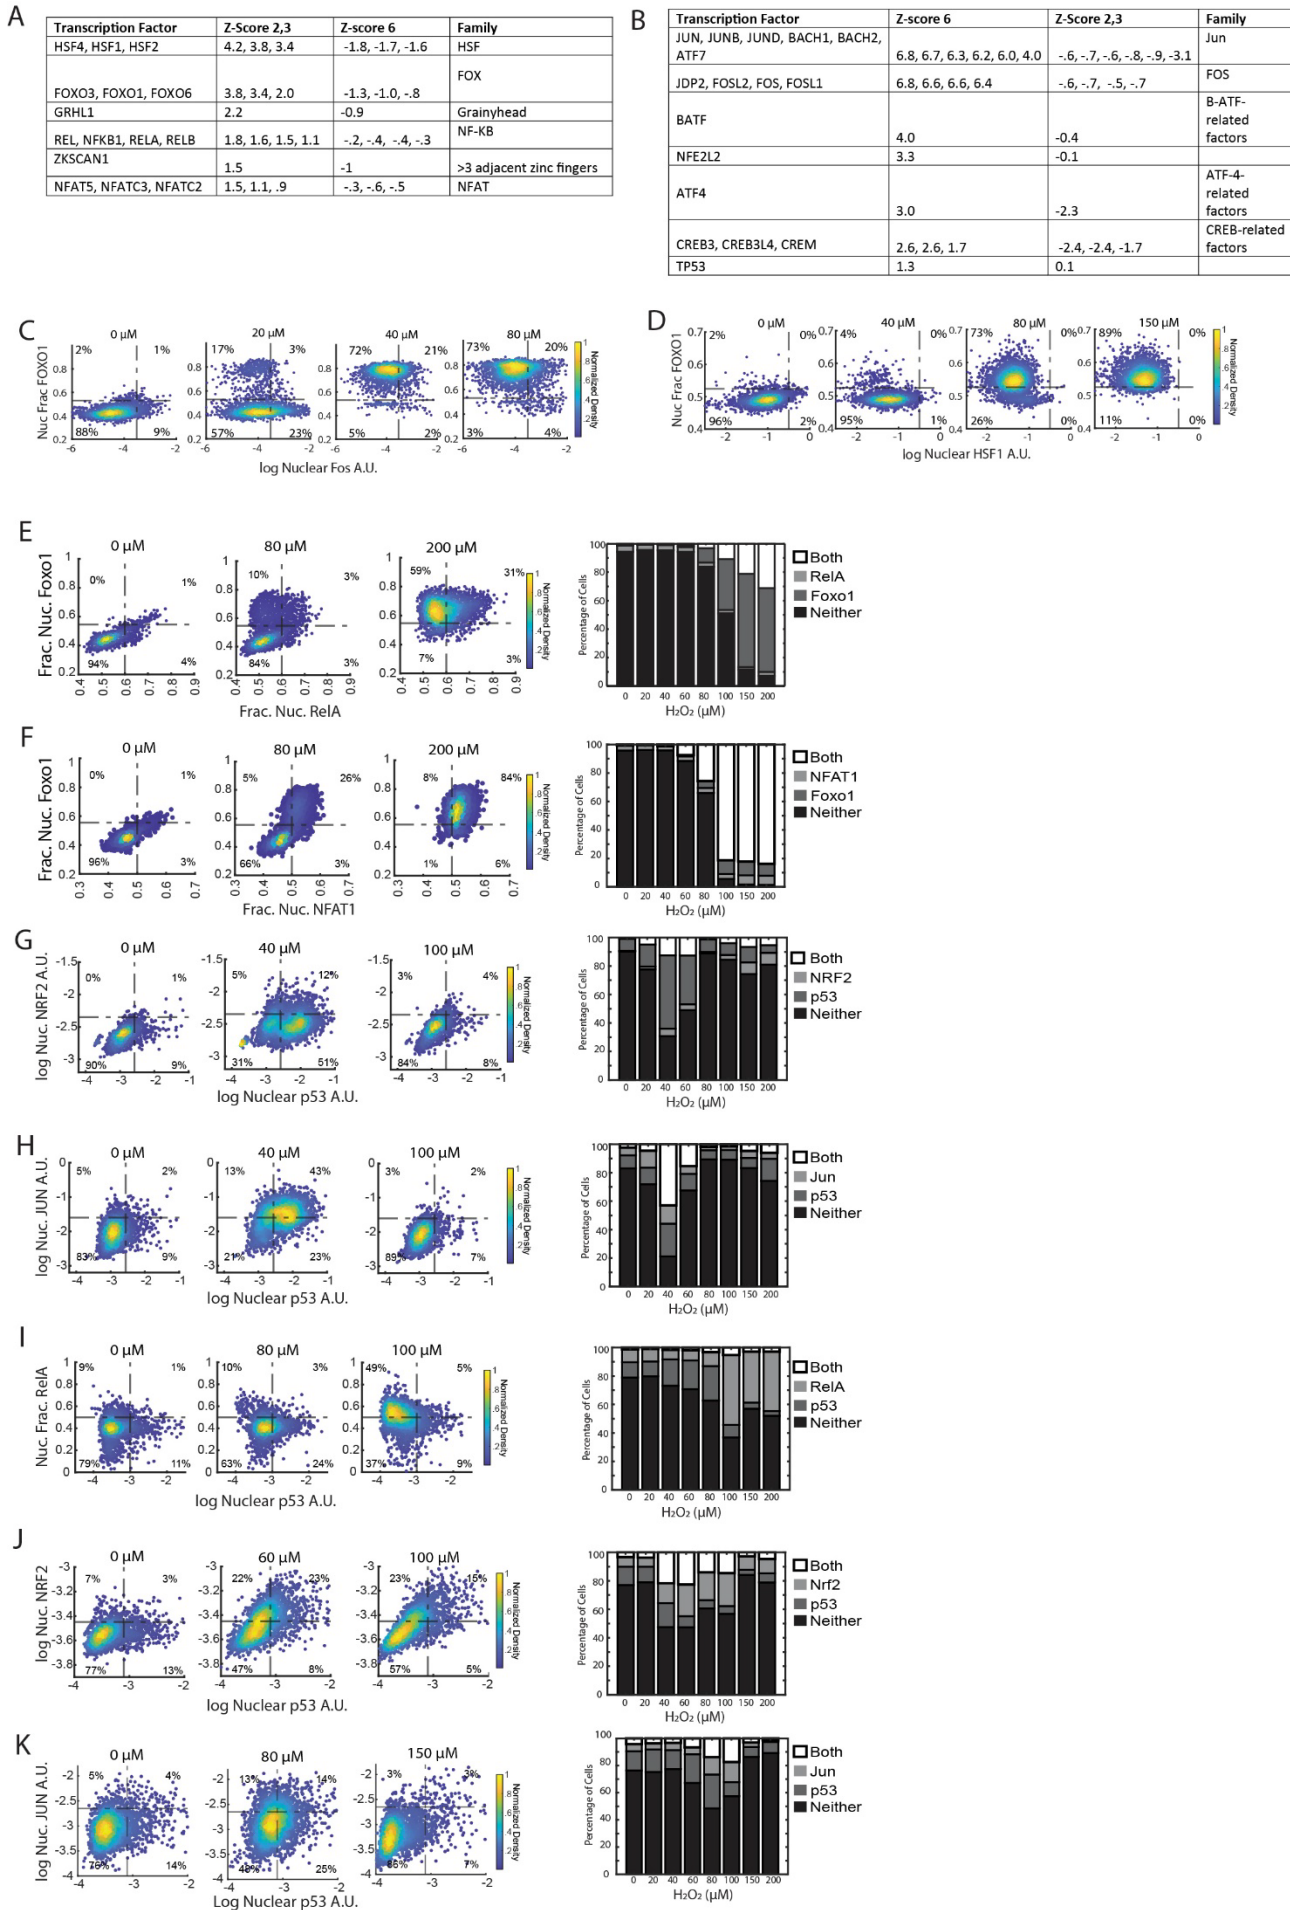

**Supplemental Fig 3: Other TFs are activated with FOXO1 and p53.** **a** TF binding motifs enriched in clusters 2 and 3 of single-cell ATAC data. **b** TF binding motifs enriched in cluster 6. Motifs of TFs not expressed in gene expression data (<.1 counts per cell) were omitted from a,b. **c-h** Immunofluorescence data measured in MCF7 cells represented as density colored scatter plots. **c** Nuclear fraction of FOXO1 and log of nuclear FOS in MCF7 cells (n>1500) treated with H<sub>2</sub>O<sub>2</sub> for 5 hours. **d** Nuclear fraction of FOXO1 and nuclear fraction of HSF1 for MCF7 cells (n>3000) treated with H<sub>2</sub>O<sub>2</sub> for 5 hours. **e** Fraction of RelA in the nucleus and the fraction of FOXO1 in the nucleus following H<sub>2</sub>O<sub>2</sub> treatment for 5 hours. MCF7 cells (n>5000). **f** Fraction of NFAT1 in the nucleus and the fraction of FOXO1 in the nucleus following H<sub>2</sub>O<sub>2</sub> treatment for 5 hours. MCF7 cells (n>5000). **g** log nuclear p53 and log nuclear NRF2 following H<sub>2</sub>O<sub>2</sub> treatment for 5 hours. MCF7 cells (n>1000) **h** log nuclear p53 and log nuclear JUN (y-axis) following H<sub>2</sub>O<sub>2</sub> treatment for 5 hours. MCF7 cells (n>500) **i-k** is immunofluorescence data measured in MCF10A cells. **i** log nuclear p53 and the fraction of RelA in the nucleus following H<sub>2</sub>O<sub>2</sub> treatment for 2 hours. (n>2000) **j** log nuclear p53 and log nuclear NRF2 following H<sub>2</sub>O<sub>2</sub> treatment for 2 hours. (n>1500) **k** log nuclear p53 and log nuclear JUN (y-axis) following H<sub>2</sub>O<sub>2</sub> treatment for 2 hours (n>1500). Source data are provided in Source Data Supp Figure 3. Source data for all single-cell ATAC data is provided here: <https://www.ncbi.nlm.nih.gov/geo/query/acc.cgi?acc=GSE227556>. All immunofluorescence experiments have been repeated three times with similar results.

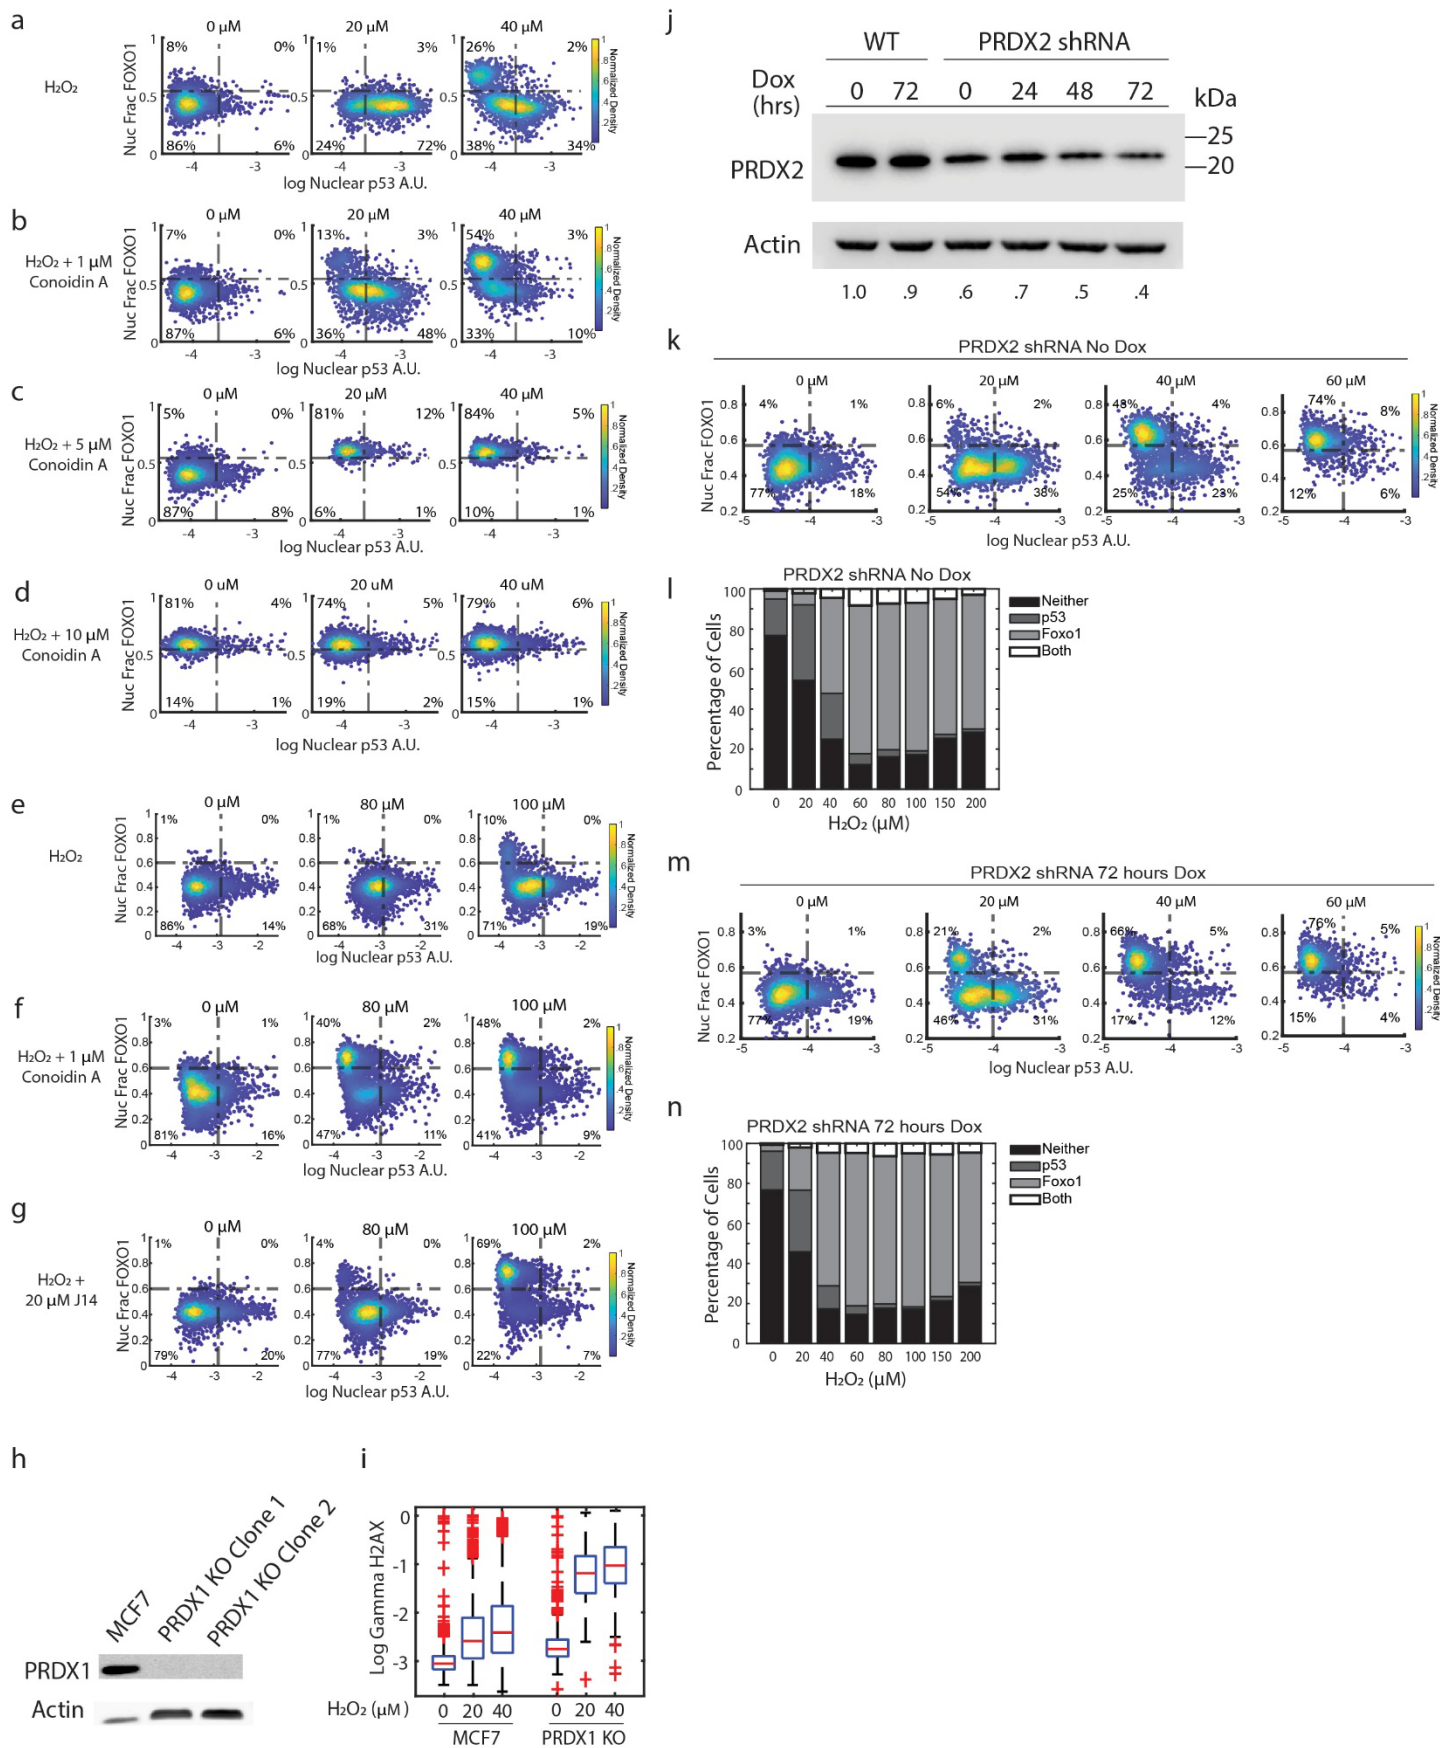

**Supplemental Figure 4: The PRDX/SRXN1 system controls p53 and FOXO1 activation.** **a-d** Density colored scatter plots of log nuclear levels of p53 (x-axis) and the nuclear fraction of FOXO1 (y-axis) in MCF7 cells (n>1000) treated with **a** H<sub>2</sub>O<sub>2</sub>, or H<sub>2</sub>O<sub>2</sub> combined with **b** 1  $\mu$ M Conoidin A, **c** 5 $\mu$ M Conoidin A, **d** 10  $\mu$ M of Conoidin A. Measure by immunofluorescence after 5 hours of treatment. **e-g** Density colored scatter plots of MCF10A cells (n>2000) treated with **e** H<sub>2</sub>O<sub>2</sub>, or H<sub>2</sub>O<sub>2</sub> combined with **f** 1  $\mu$ M Conoidin A, **g** 20  $\mu$ M J14. Measured by immunofluorescence 2 hours after treatment. **h** Western Blot stained with PRDX1 antibody to validate PRDX1 knockout MCF7 cells. **i** Bar and whisker plots of  $\gamma$ H2AX levels. Measured by immunofluorescence (n>2000) in MCF7 cells and MCF7 PRDX1 knockout cells treated with 20 $\mu$ M of H<sub>2</sub>O<sub>2</sub> for 3 hours. Central line indicates the median. Bottom and top edges of the box indicate the 25<sup>th</sup> and 75<sup>th</sup> percentiles. Whiskers indicate the extreme data points. Outliers are indicated by a red plus sign. **j** Western blot of PRDX2 levels of MCF7 cells (WT) and MCF7 cells harboring a doxycycline (Dox) inducible shRNA targeting PRDX2. Actin is the loading control. Time of Dox exposure in hours is indicated above the blot. Quantification at bottom is PRDX2 levels divided by actin levels normalized to WT cells at 0 hours. **k** Density colored scatter plots of nuclear p53 levels and the nuclear fraction of FOXO1 of MCF7 PRDX2 shRNA cells without doxycycline. Cells (n>900) treated with H<sub>2</sub>O<sub>2</sub> for 5 hours. Data from immunofluorescence experiments. **l** Same experiment as K; bar graph indicating the percentage of cells activating p53 and FOXO1 for all concentrations of H<sub>2</sub>O<sub>2</sub> tested. **m** Density colored scatter plots of p53 levels and the nuclear fraction of FOXO1 of MCF7 PRDX2 shRNA cells treated with doxycycline for 72 hours before H<sub>2</sub>O<sub>2</sub>. H<sub>2</sub>O<sub>2</sub> treatment for 5 hours. (n>1500) **n** Same experiment as m; bar graph indicating the percentage of cells activating p53 and FOXO1 for all H<sub>2</sub>O<sub>2</sub> concentrations. Doxycycline concentrations for all experiments is 1.25  $\mu$ g/ml. Source data are provided in Source Data Supp Figure 4. Immunofluorescence experiments and western blots repeated three times with similar results.



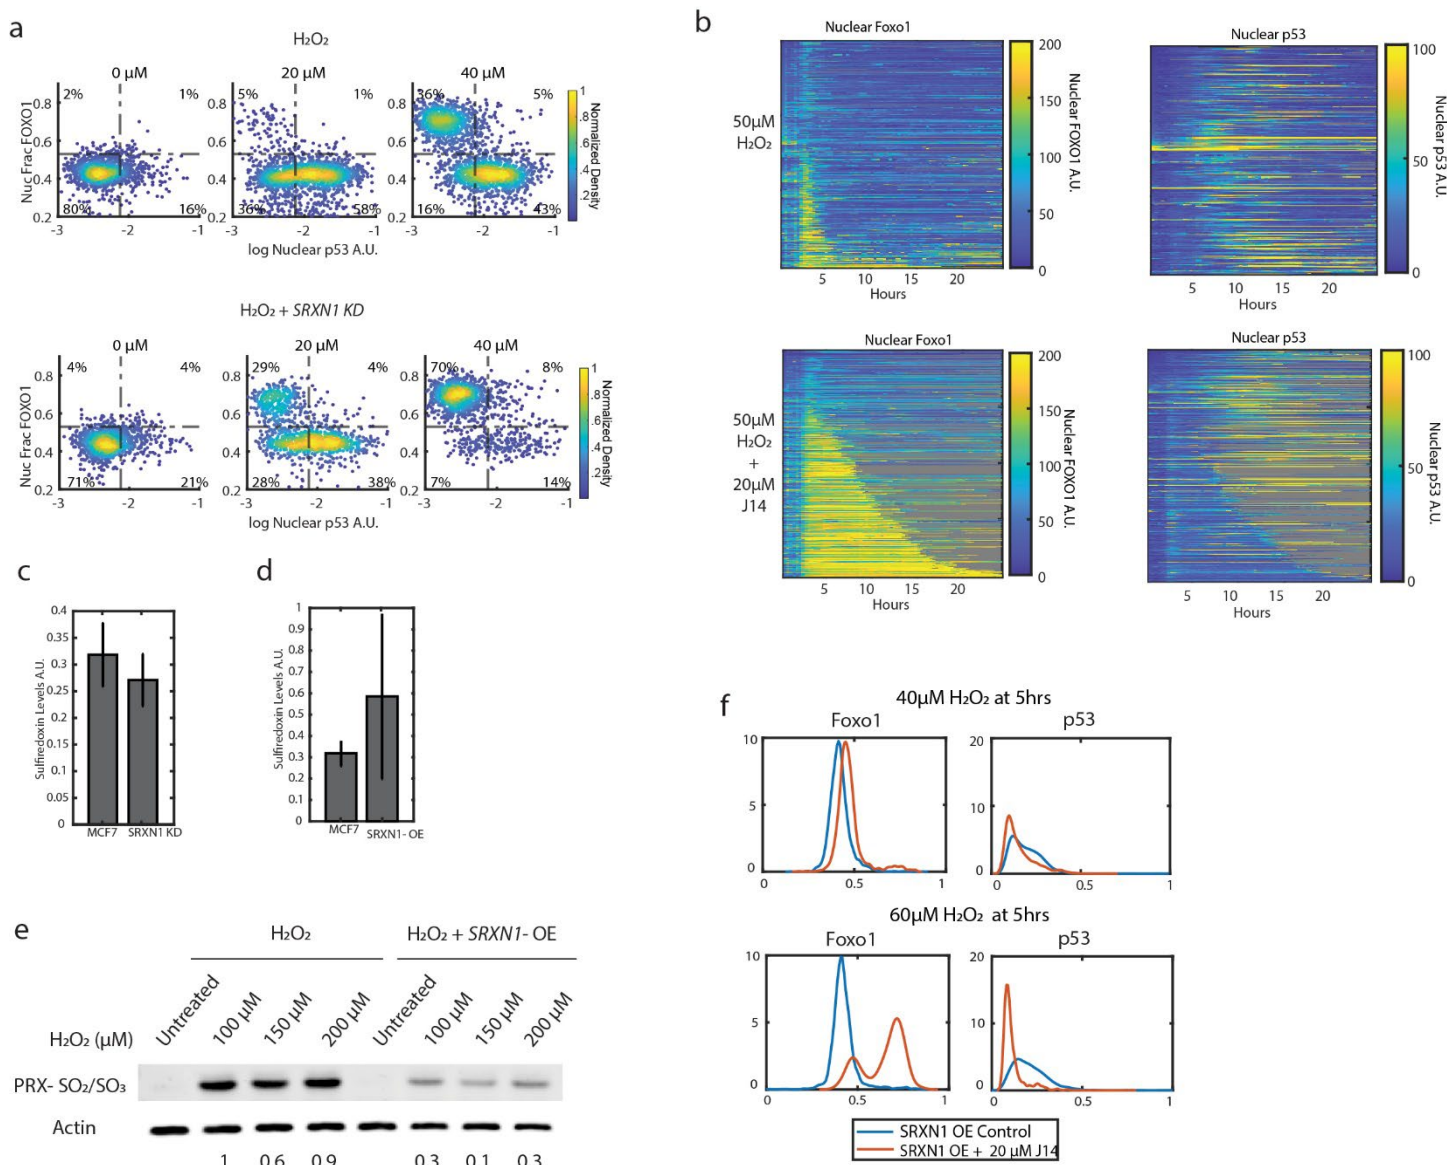

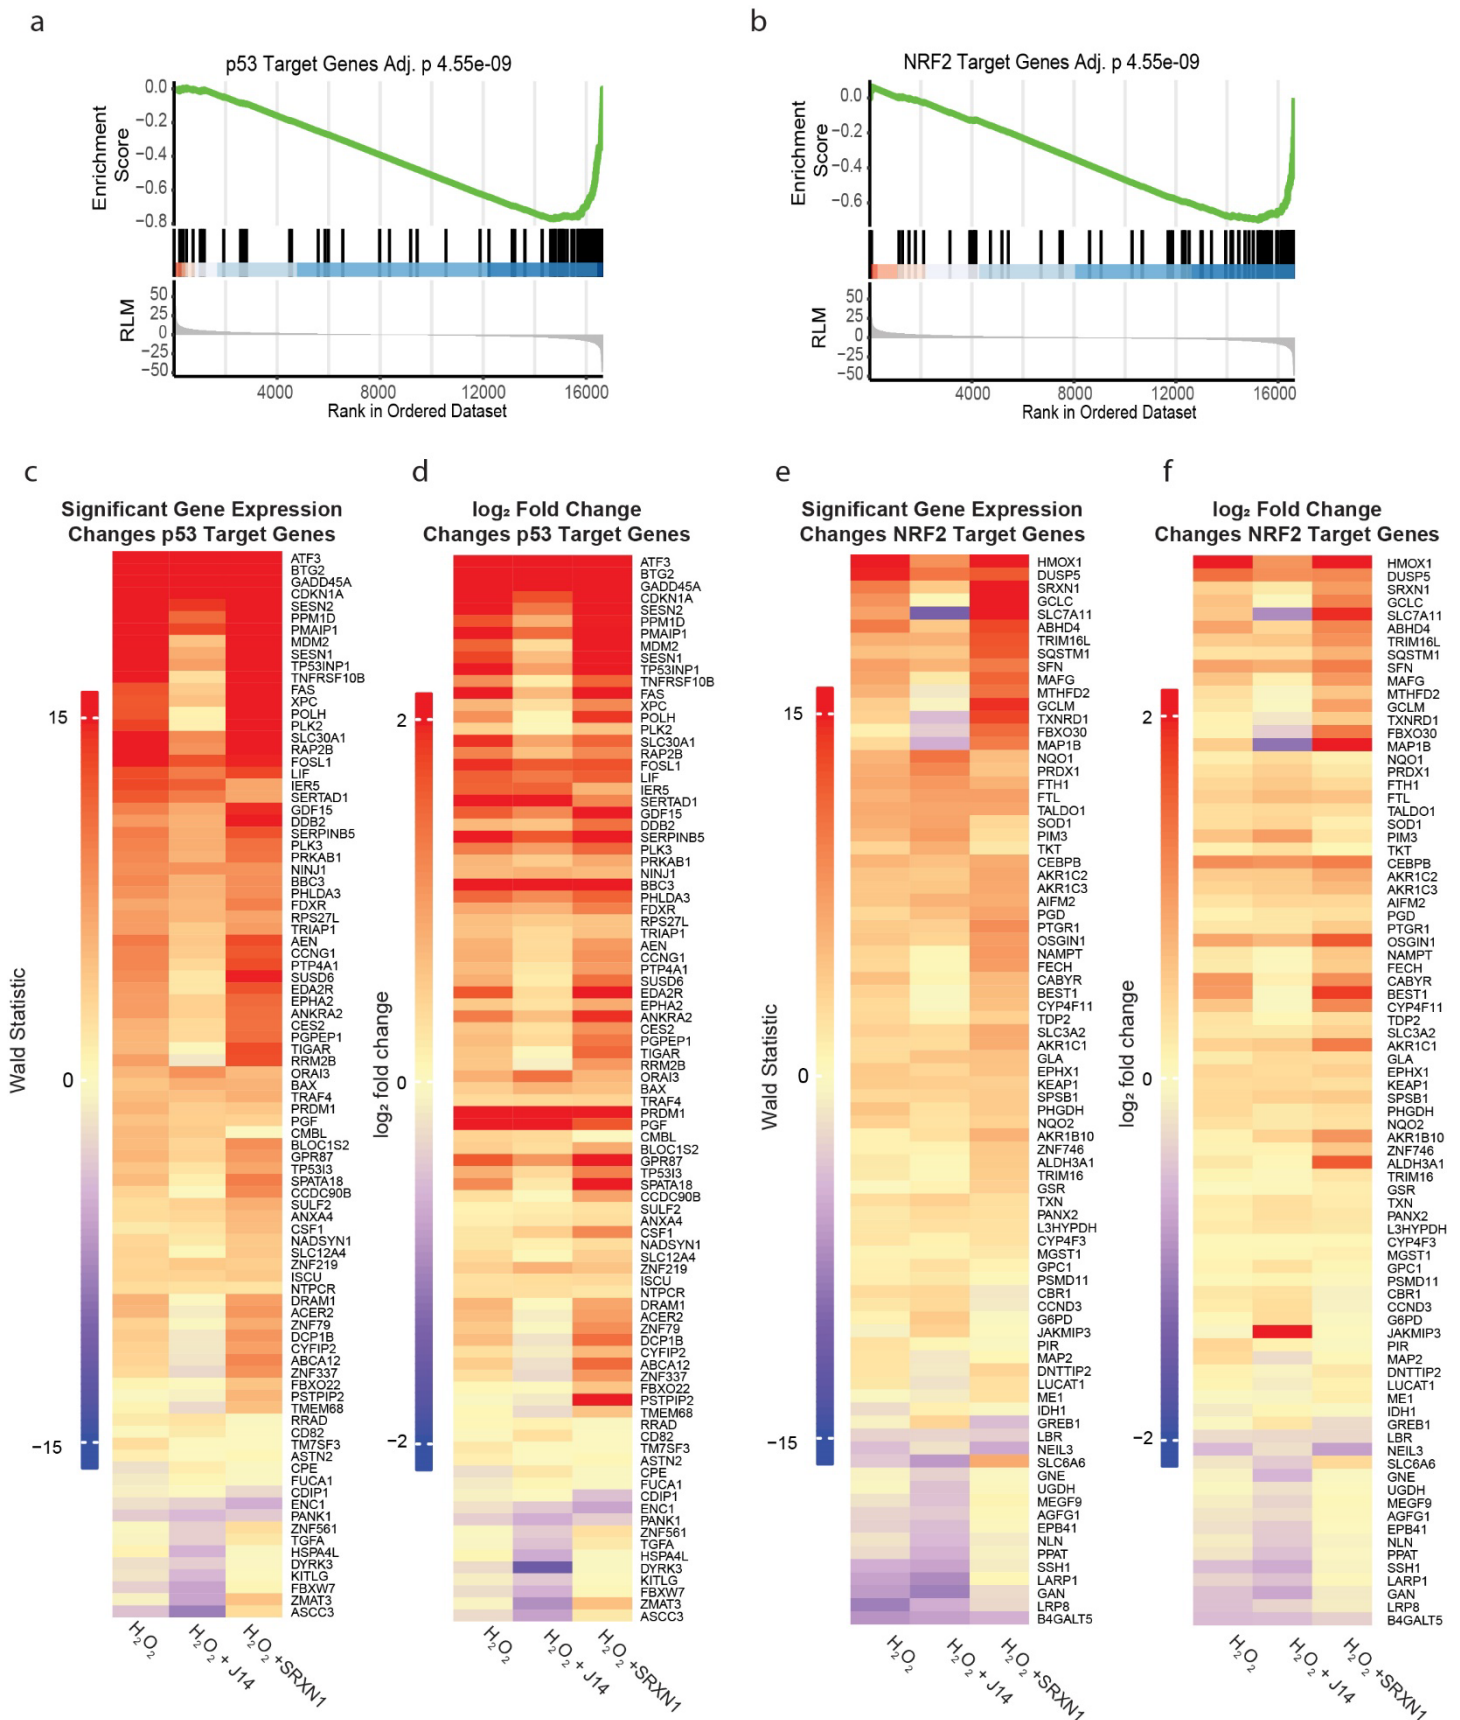

**Supplemental Figure 6. Differential gene expression analysis of p53 and NRF2 target genes using RNA-seq. a** Gene set enrichment analysis (GSEA) of p53 target genes in J14 + H<sub>2</sub>O<sub>2</sub> samples as compared to SRXN1-

OE + H<sub>2</sub>O<sub>2</sub> samples **b** GSEA of NRF2 target genes in J14 + H<sub>2</sub>O<sub>2</sub> samples as compared to SRXN1-OE + H<sub>2</sub>O<sub>2</sub> samples. **c** Wald statistic and **d** log<sub>2</sub> fold changes of p53 target genes in H<sub>2</sub>O<sub>2</sub> treated cells vs. PBS controls, H<sub>2</sub>O<sub>2</sub> + J14 treated cells vs J14 treated controls and H<sub>2</sub>O<sub>2</sub> treated SRXN1-OE cells vs. SRXN1-OE PBS controls. **e** Wald statistic and **f** log<sub>2</sub> fold changes of NRF2 target genes in H<sub>2</sub>O<sub>2</sub> treated cells vs. PBS controls, H<sub>2</sub>O<sub>2</sub> + J14 treated cells vs J14 treated controls and H<sub>2</sub>O<sub>2</sub> treated SRXN1-OE cells vs. SRXN1-OE PBS controls. H<sub>2</sub>O<sub>2</sub> concentration is 50μM, J14 20μM. (RLM, Ranked List Metric). P-values in a and b were calculated by permutation test and adjusted using the Benjamini-Hochberg correction. RNA-seq was performed on 3 biological replicates. Source data are available here: <https://www.ncbi.nlm.nih.gov/geo/query/acc.cgi?acc=GSE227556>.
